# Supplementary material
Source: publisher site journal article supplement (https://www.dovepress.com/article/270487)

## Supplementary Figure

Sanger sequencing electropherograms of the index patient and her parents.

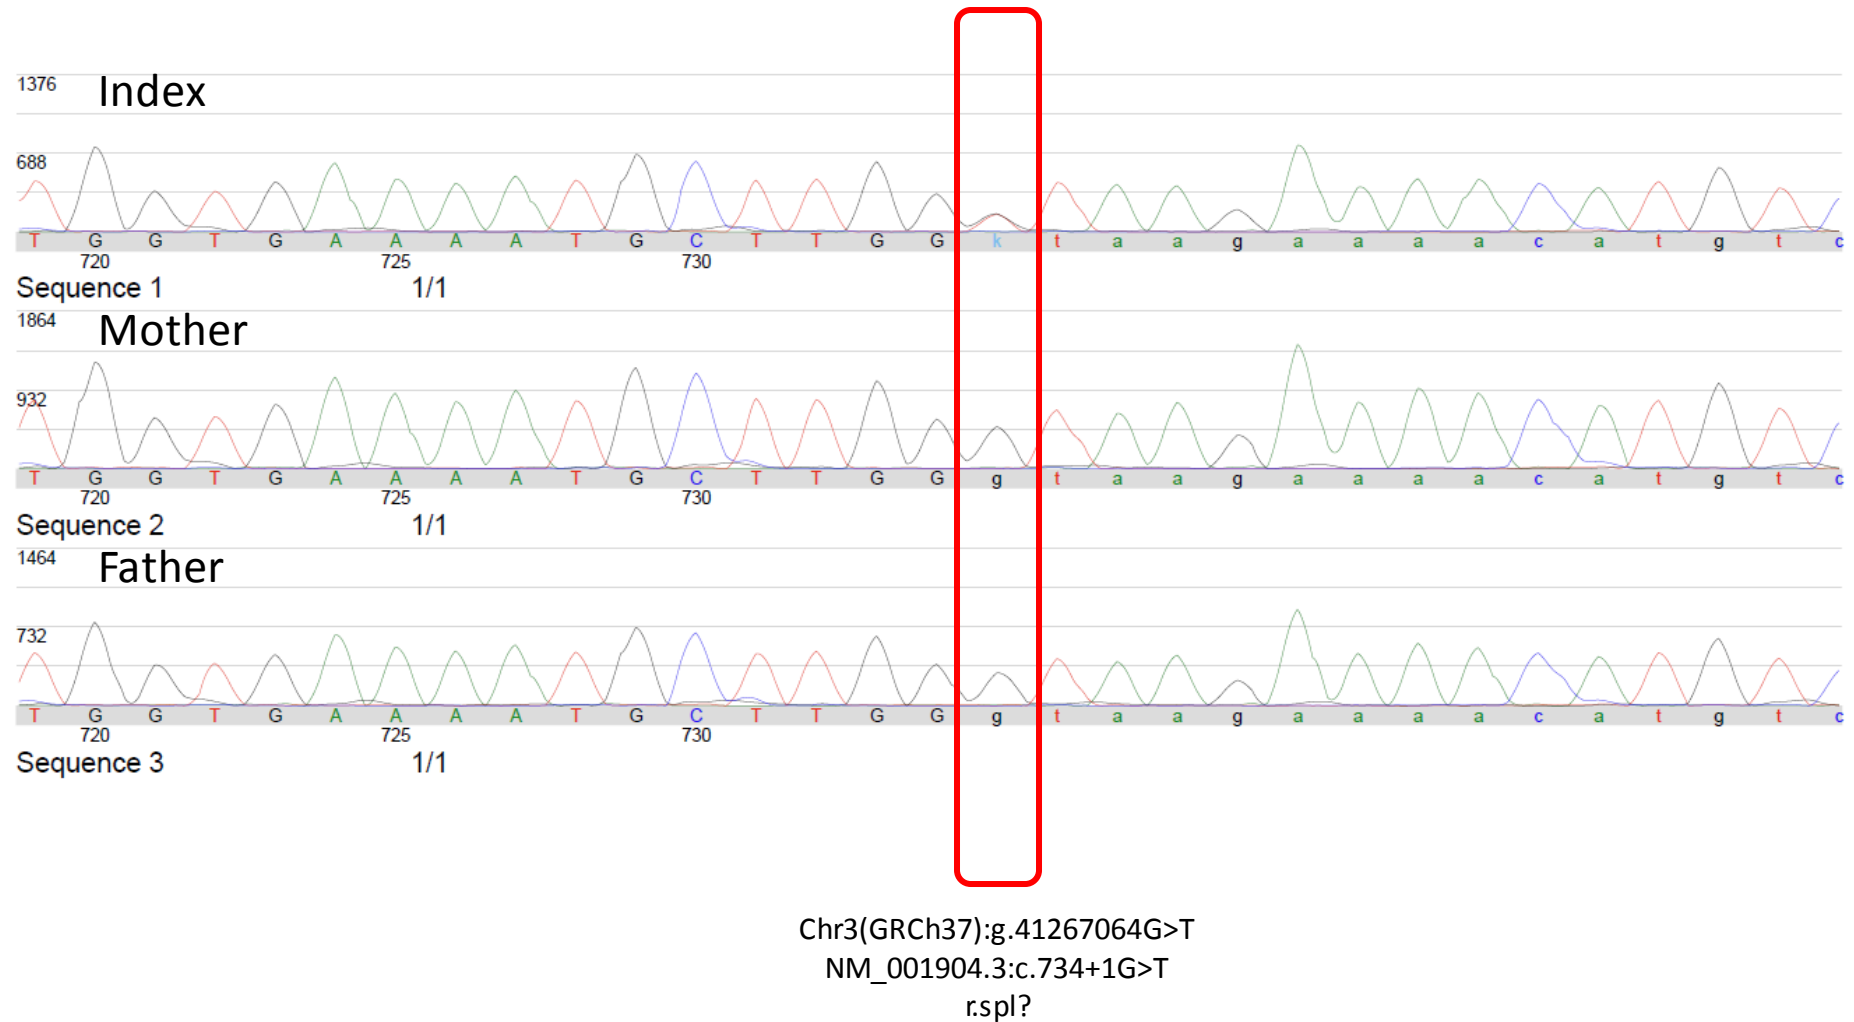

Supplement: Supplementary file 1 [file get_supplementary_file.php]
